# Supplementary material for: Lower Expression of MicroRNA-155 Contributes to Dysfunction of Natural Killer Cells in Patients with Chronic Hepatitis B
Source: PubMed Central journal article supplement (PMC5614978; doi:10.3389/fimmu.2017.01173), 2017-09-22

# Suppl.Fig.1

**A**

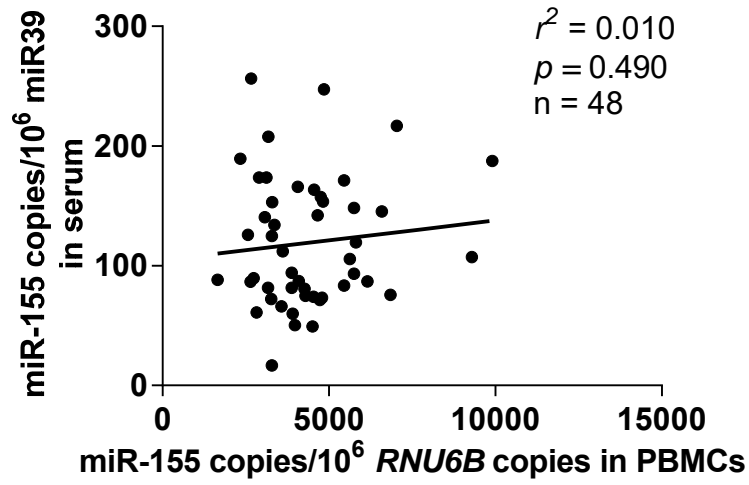

**B**

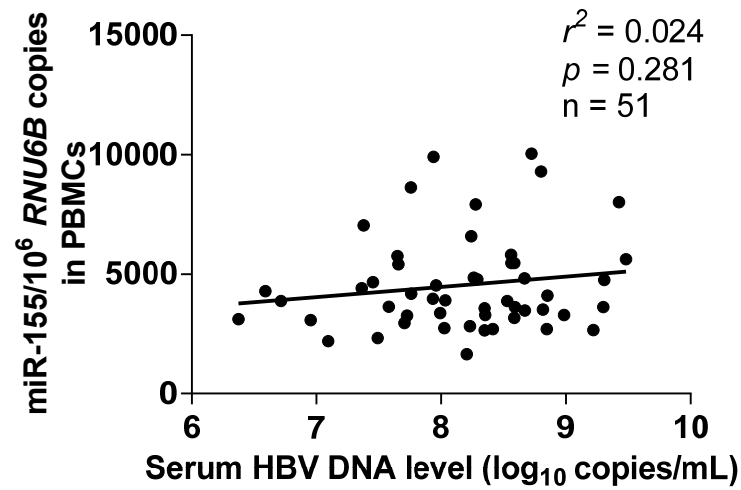

**C**

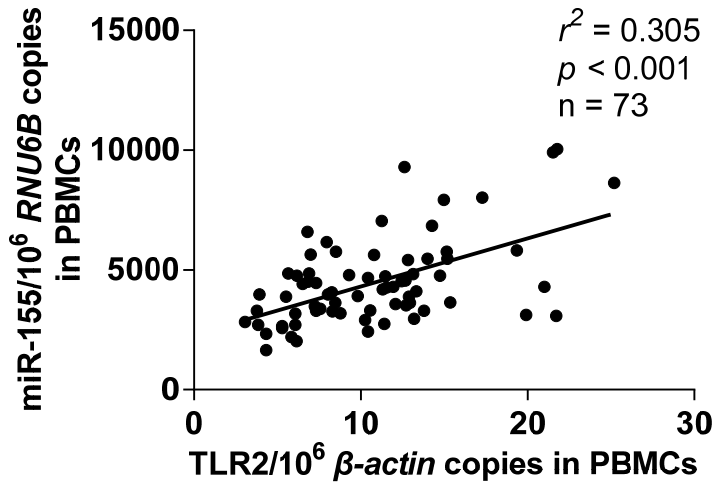

# Suppl.Fig.2

**A**

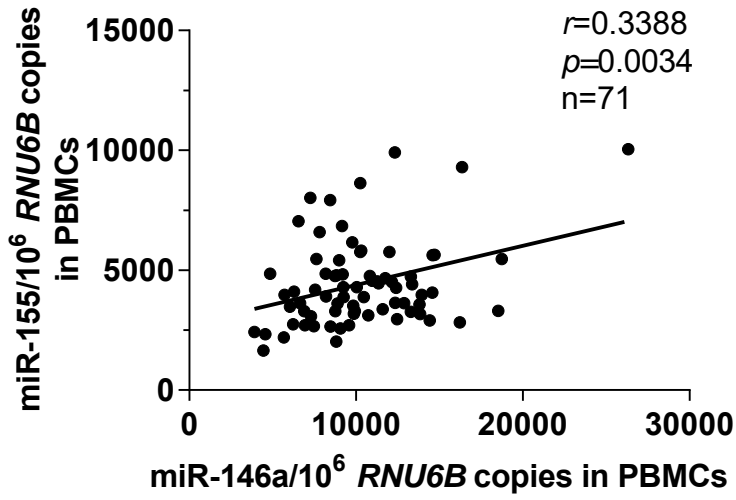

**B**

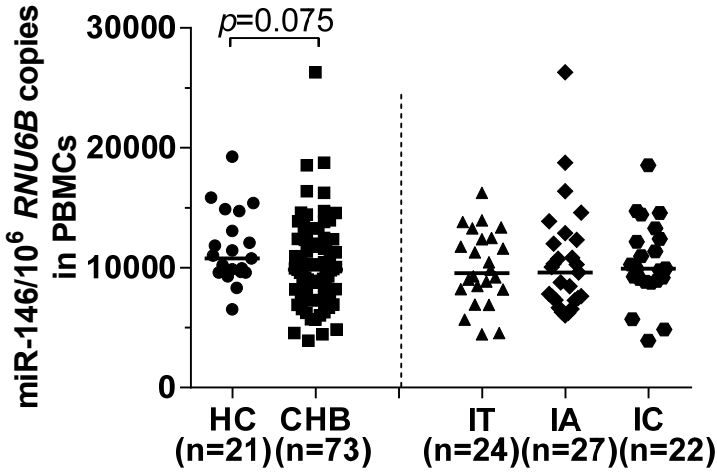

**C**

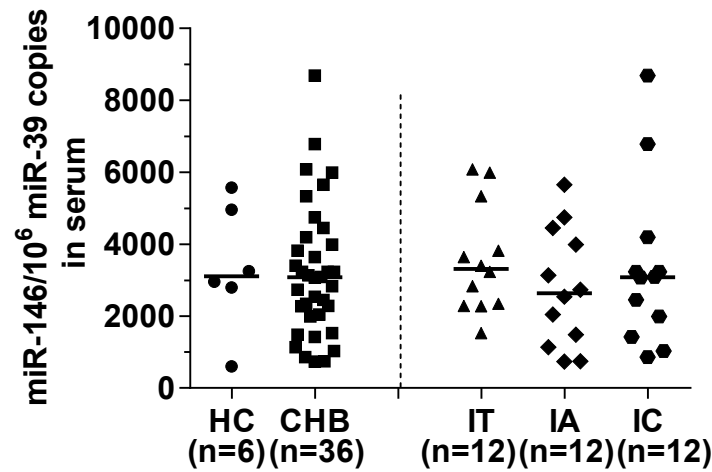

# Suppl.Fig.3

**A**

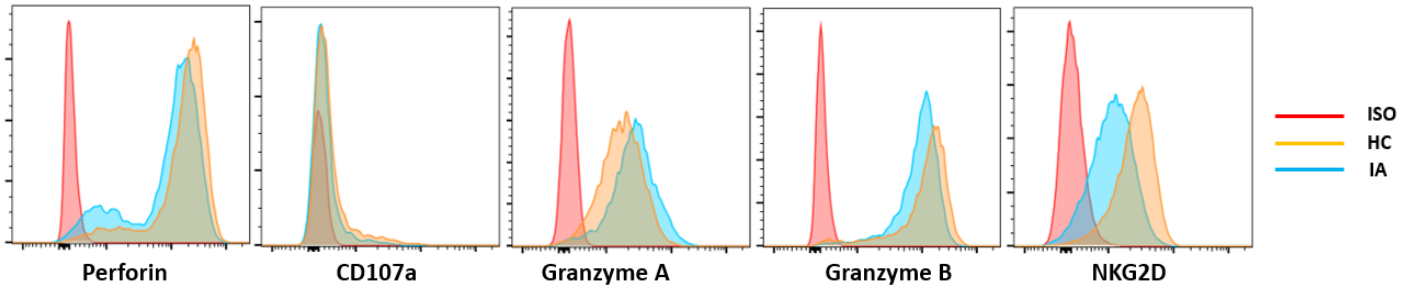

**B**

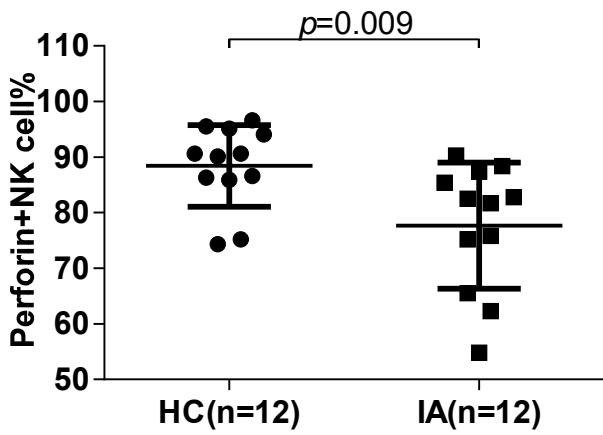

**C**

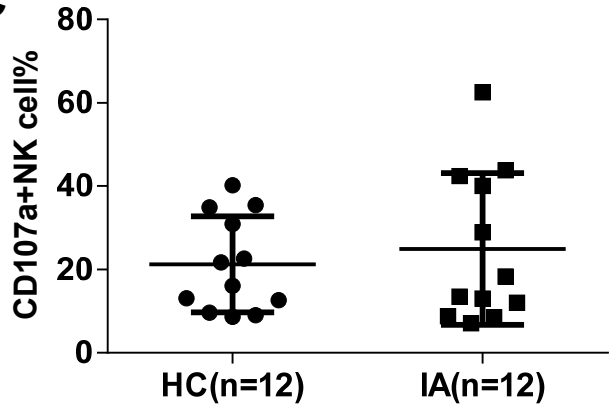

**D**

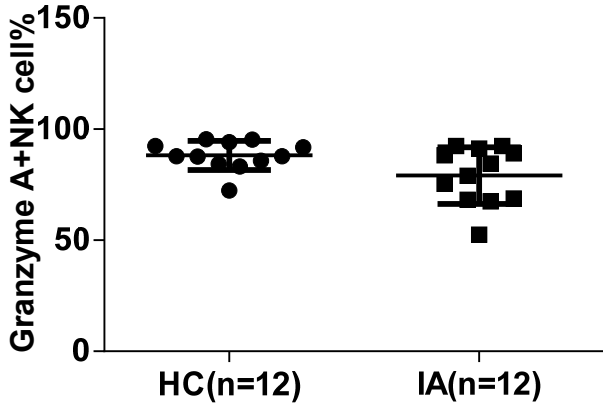

**E**

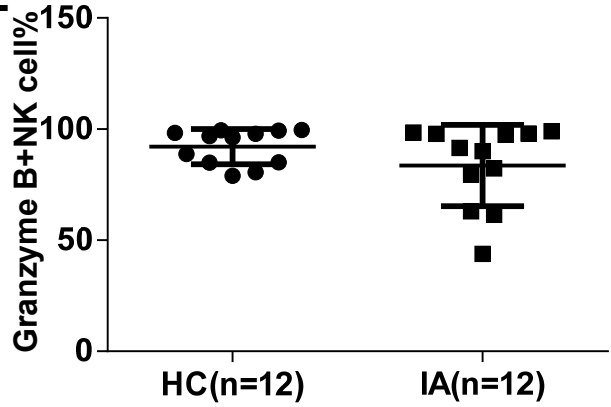

**F**

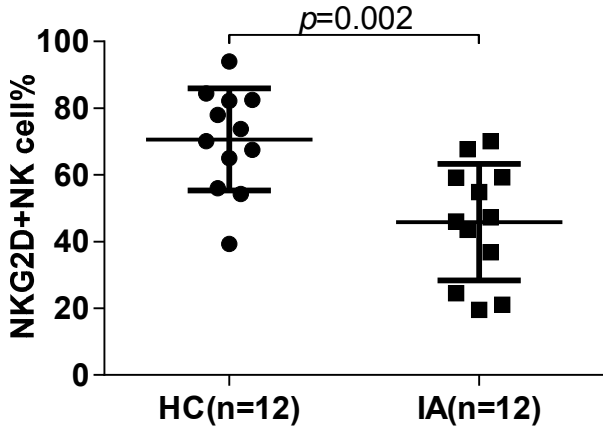

**G**

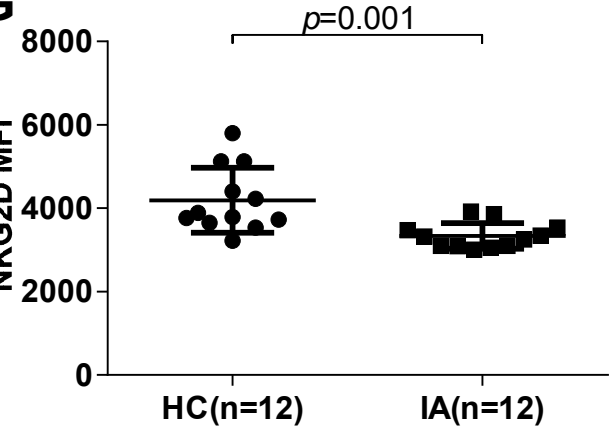

# Suppl.Fig.4

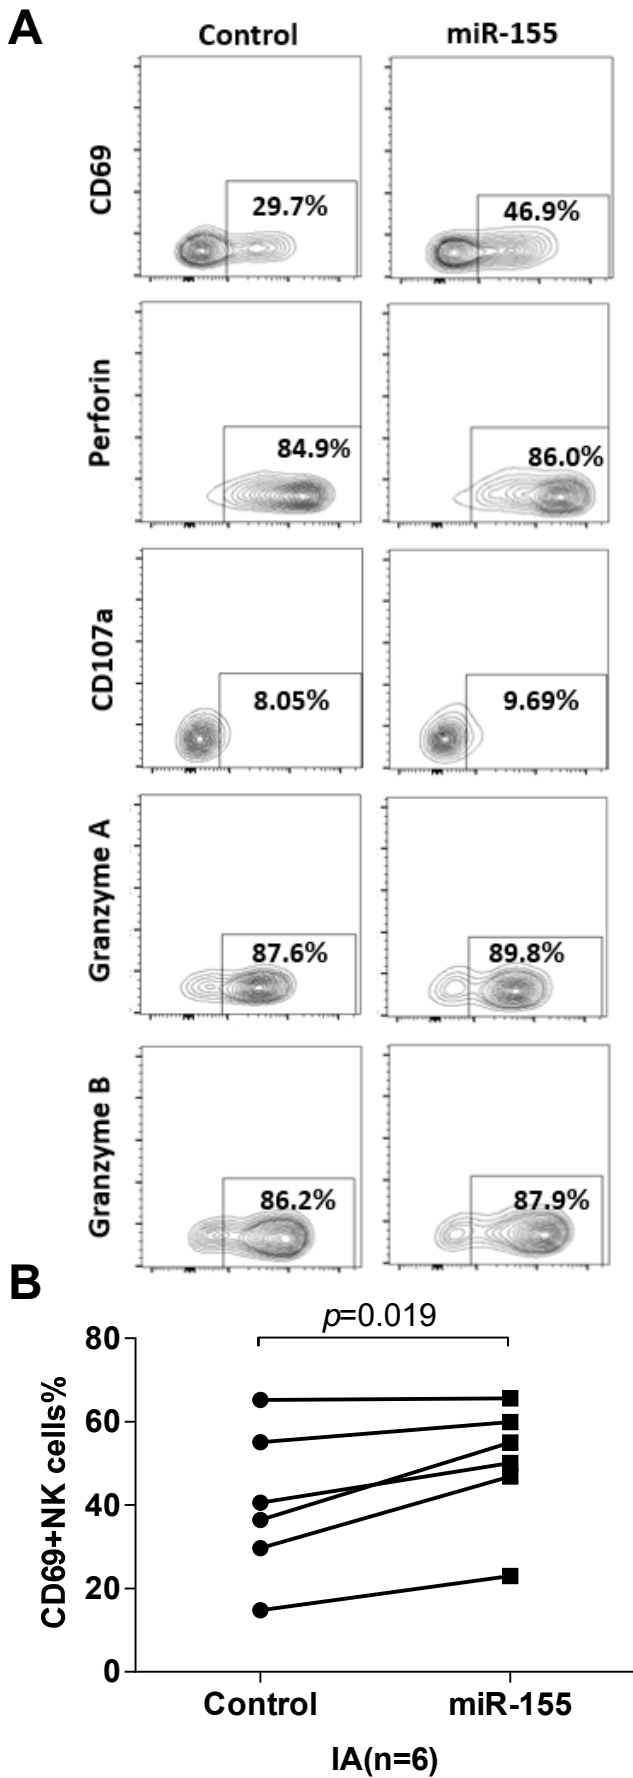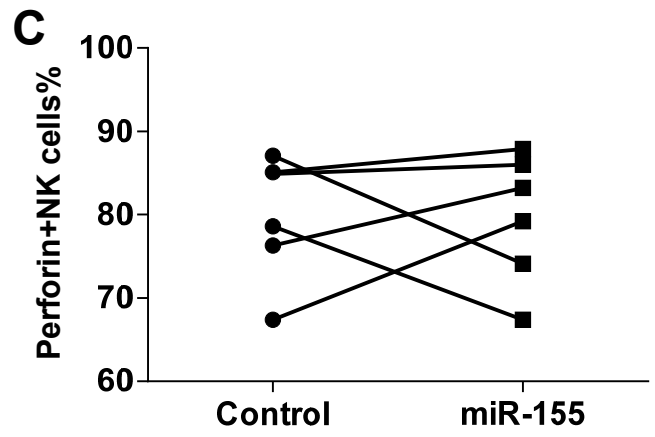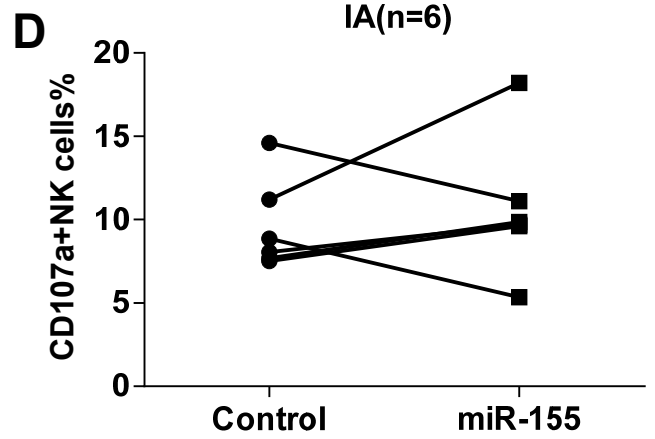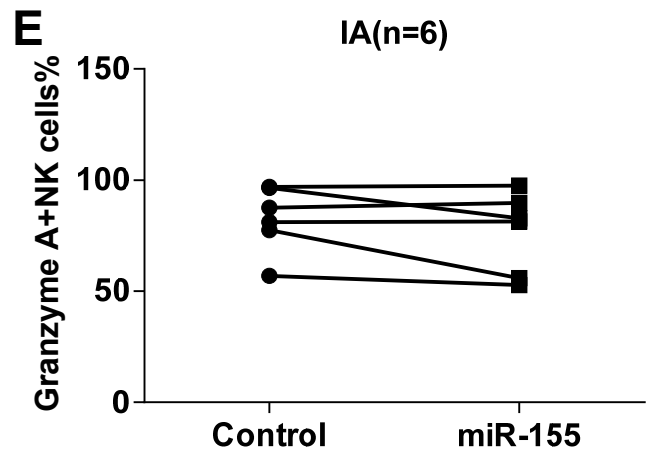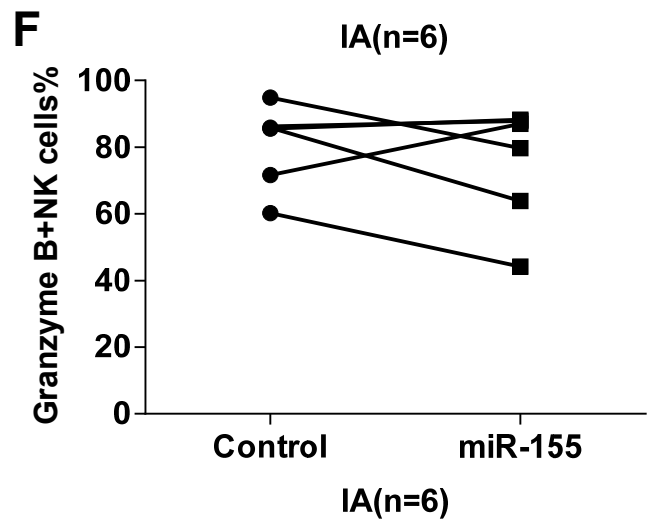

# Suppl.Fig.4

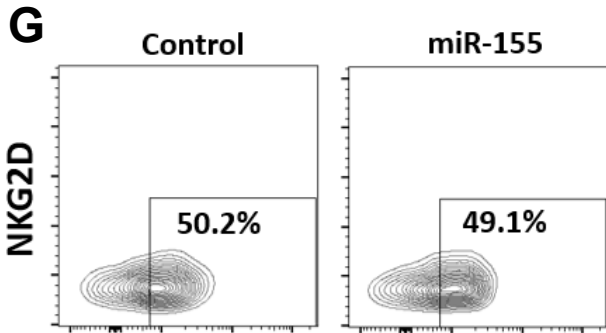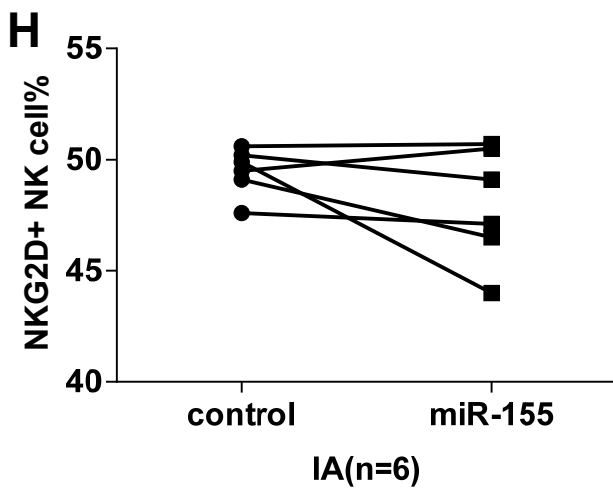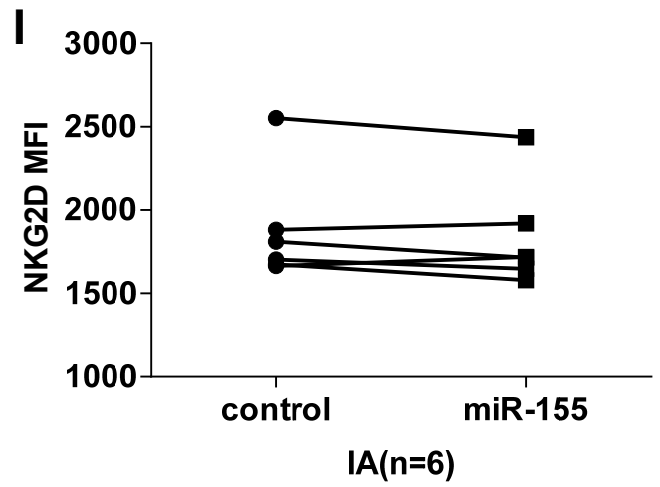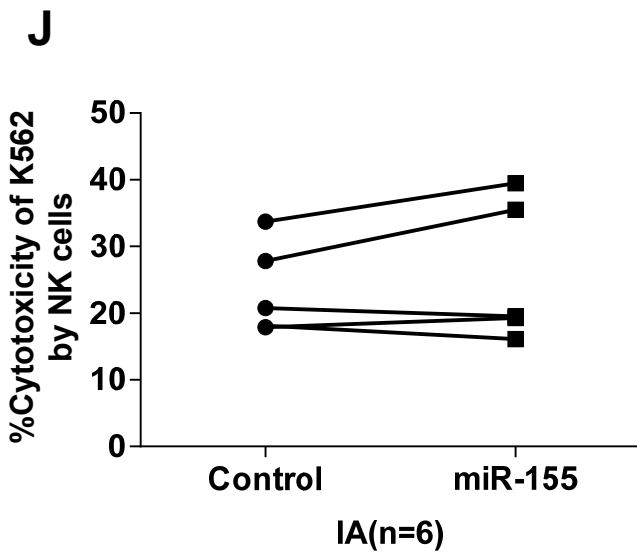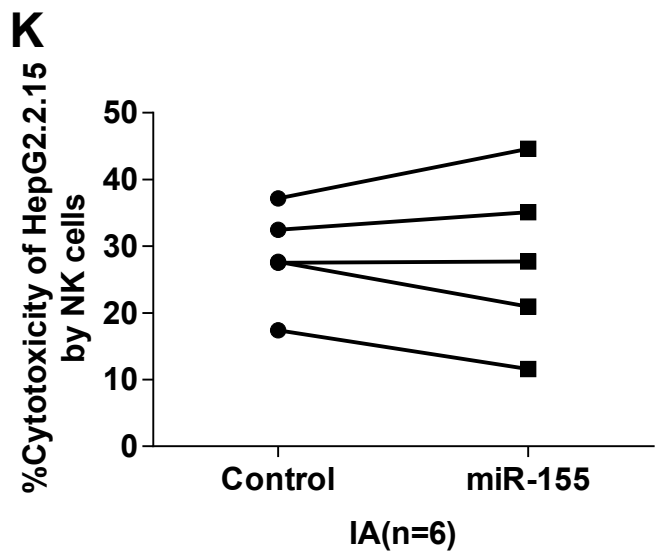

# Suppl.Fig.5

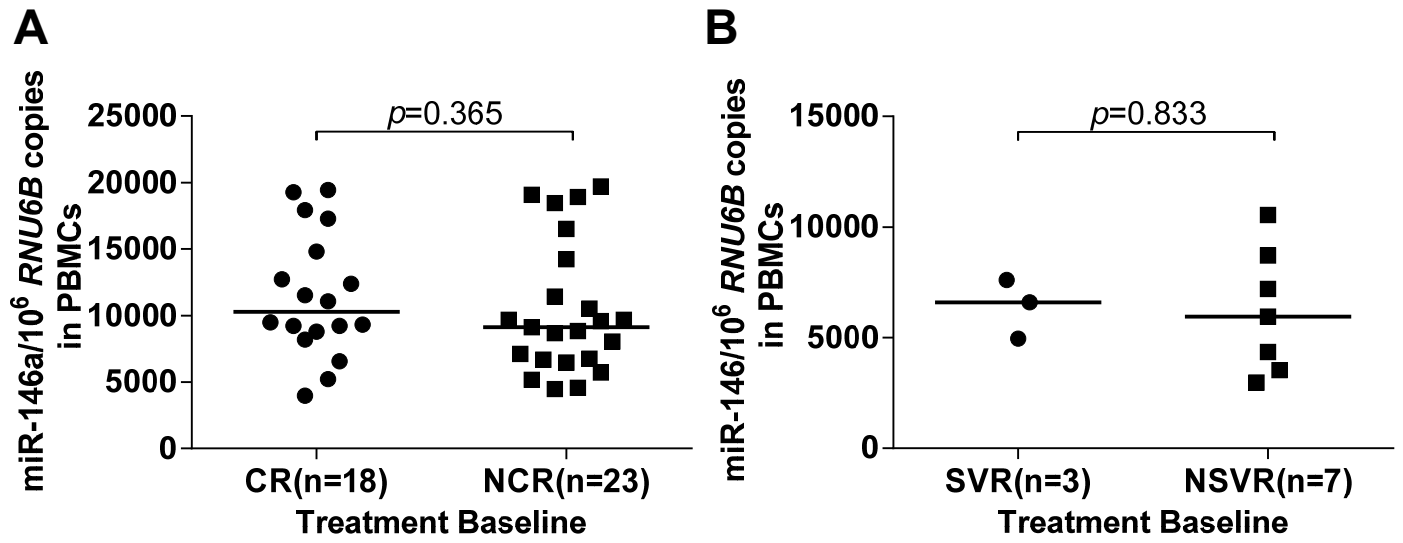

Supplement: data_sheet_2.pdf [file data_sheet_2.pdf]
